Development 136, 877 (2009) doi:10.1242/dev.034751

## Flamingo regulates epiboly and convergence/extension movements through cell cohesive and signalling functions during zebrafish gastrulation

**Filipa Carreira-Barbosa, Mihoko Kajita, Veronique Morel, Hironori Wada, Hitoshi Okamoto, Alfonso Martinez Arias, Yasuyuki Fujita, Stephen W. Wilson and Masazumi Tada**

There was an error published in *Development* **136**, 383-392.

The name of author Mihoko Kajita was spelt incorrectly. The corrected author list appears above.

The authors apologise to readers for this mistake.
